# Supplementary material for: Adjustment of carbon fluxes to light conditions regulates the daily turnover of starch in plants: a computational model
Source: Royal Society of Chemistry journal article supplement (doi:10.1039/c3mb70459a), 2013-12-17
Supplement: c3mb70459a2.pdf [file c3mb70459a2.pdf]

**Table S1.** Values of the model parameters used in ODE equations, described in the Supplementary Information. The Table divided on four parts (A-D), which correspond to parts A-D of the Supplementary Information.

| A. Parameters of carbon fixation and starch synthesis reactions |                    |                      |                                        |                      |                   |                    |
|-----------------------------------------------------------------|--------------------|----------------------|----------------------------------------|----------------------|-------------------|--------------------|
| Parameter                                                       | $Pi_{tot}$         | $K_{M\_ATP_{synt}}$  | $K_{M\_HP}$                            | $K_{M\_THP}$         | $K_{M\_SP}$       | $V_{m\_sFBP}$      |
| Value                                                           | 10 mM              | 0.3 mM               | 0.04 mM                                | 0.08 mM              | 0.6 mM            | 0.85 mM/s          |
| ref                                                             | 1                  | 2                    | 1, 3                                   | 1, 3                 | varied, text      | 4                  |
| Parameter                                                       | $K_{iF6P\_FBPase}$ | $K_{M\_sFBP}$        | $ATP_s$                                | $ADP_s$              | $V_{m\_agp}$      | $K_{M\_agp\_G1P}$  |
| Value                                                           | 0.7 mM             | 0.033 mM             | 0.71 mM                                | 0.23 mM              | 0.24 mM/s         | 0.08 mM            |
| ref                                                             | 5                  | 6                    | 7, 8                                   | 7, 8                 | 5, 9              | 5                  |
| Parameter                                                       | $K_{M\_agp\_ATP}$  | $K_{a\_agp\_PGA}$    | $V_{M\_TPT}$                           | $K_{eq\_sAld}$       | $K_{eq\_TPiso}$   | $K_{eq\_PGA\_GAP}$ |
| Value                                                           | 0.08 mM            | 0.1                  | 1.1 mM/s                               | 7.1 mM <sup>-1</sup> | 22                | 0.009 mM           |
| ref                                                             | 5                  | 5                    | 10                                     | 11                   | 11                | 11                 |
| Parameter                                                       | $NADP$             | $NADPH$              | $K_{eq\_PGI}$                          | $K_{eq\_PGM}$        | $v_{phsyn}^{obs}$ | $v_c, v_s$         |
| Value                                                           | 0.29 mM            | 0.21 mM              | 2.3                                    | 0.058                | 0.4 mM/s          | 65, 23 μl/gFW      |
| ref                                                             | 12                 | 12                   | 11                                     | 5                    | 13, 14            | 15                 |
| B. Parameters of starch degradation reactions                   |                    |                      |                                        |                      |                   |                    |
| Parameter                                                       | $f$                | $f_M$                | $f_{G3}$                               | $K_{M\beta}^{St}$    | $k_{\beta}^G$     | $K_{M\beta}^G$     |
| Value                                                           | 0.582              | 0.87                 | 0.13                                   | 1.46 mM              | 1.25              | 4.27 mM            |
| ref                                                             | 16                 | 17                   | 17                                     | 16                   | 16                | 16                 |
| Parameter                                                       | $K_{M\_mex}$       | $K_{M\_glut}$        | $K_{Misa}$                             | $K_{Mr}$             | $v_s$             | $v_c$              |
| Value                                                           | 4 mM               | 19.3 mM              | 1.46 mM                                | 12 mM <sup>2</sup>   | 65 μL/gFW         | 23 μL/gFW          |
| ref                                                             | 17                 | 18                   | estim., text                           | 17                   | 15                | 15                 |
| Parameter                                                       | $K_{eq}^{dpe}$     | $K_{eq}^{dpe2\_phs}$ | $V_{M\_dpe1}$                          | $V_{M\_dpe2}$        | $V_{M\_mex}$      | $V_{M\_glut}$      |
| Value                                                           | 1                  | 1                    | 0.1 mM/s                               | 0.1 mM/s             | 0.1 mM/s          | 0.02 mM/s          |
| ref                                                             | 17                 | 17                   | 17                                     | 17                   | 18-23, see text   | 18-23, see text    |
| Parameter                                                       | $V_{M\_β}$         | $V_{M\_isa}$         | $k_{d\_int}$                           | $K_{M\_hxx}$         | $K_{iG6P}$        | $V_{M\_hxx}$       |
| Value                                                           | 0.09 mM/s          | 0.005 mM/s           | 0.003 s <sup>-1</sup> mM <sup>-1</sup> | 0.035                | 4 mM              | 0.1 mM/s           |
| ref                                                             | 18-23, see text    | 18-23, see text      | assumed, see text                      | 24                   | 25                | 9                  |
| C. Parameters of sucrose metabolism                             |                    |                      |                                        |                      |                   |                    |
| Parameter                                                       | $NADP$             | $NADPH$              | $ATP_c$                                | $ADP_c$              | $Pi_c$            | $K_{M\_cFBPase}$   |
| Value                                                           | 0.29 mM            | 0.21 mM              | 2.57 mM                                | 0.3 mM               | 3 mM              | 0.0025 mM          |
| ref                                                             | 12                 | 12                   | 7, 8                                   | 7, 8                 | 26                | 27                 |
| Parameter                                                       | $K_{iF6P\_FBPase}$ | $K_{iF26P}$          | $v_{M\_cFBPase}$                       | $v_{M\_PGI}$         | $v_{M\_PGM}$      | $K_{eq\_PGI}$      |
| Value                                                           | 0.7 mM             | 2 μM                 | 0.2 mM/s                               | 0.7 mM/s             | 1.8 mM/s          | 2.3                |
| ref                                                             | 28                 | 29                   | 30                                     | 31                   | 31                | 11                 |
| Parameter                                                       | $v_{M\_UGPase}$    | $K_{eq\_UGPase}$     | $K_{M\_UTP}$                           | $UTP_c$              | $K_{M\_F6PK}$     | $v_{M\_PFP}$       |
| Value                                                           | 3.6 mM/s           | 0.31                 | 0.093 mM                               | 1.9 mM               | 0.5 mM            | 0.1 mM/s           |
| ref                                                             | 32                 | 33                   | 34                                     | 35                   | 36                | 9                  |
| Parameter                                                       | $K_{eq\_PGM}$      | $v_{M\_SPS}$         | $K_{M\_F6P}$                           | $K_{M\_UDPG}$        | $K_{iF6P\_F26PP}$ | $K_{iPGA}$         |
| Value                                                           | 0.058              | 0.3 mM/s             | 2 mM                                   | 2 mM                 | 0.1 mM            | 0.084 mM           |
| ref                                                             | 37                 | 38                   | 38                                     | 38                   | 39                | 40                 |

|                                                                                                                                                                                                                                                                                       |                         |                                         |                      |                      |                     |                       |
|---------------------------------------------------------------------------------------------------------------------------------------------------------------------------------------------------------------------------------------------------------------------------------------|-------------------------|-----------------------------------------|----------------------|----------------------|---------------------|-----------------------|
| Parameter                                                                                                                                                                                                                                                                             | $K_{eq\_sAld}$          | $K_{eq\_TPiso}$                         | $K_{eq\_PGA\_GAP}$   | $K_{eq\_PGI}$        | $K_{eq\_PGM}$       | $K_{M\_F26PP}$        |
| Value                                                                                                                                                                                                                                                                                 | 7.1 mM <sup>-1</sup>    | 22                                      | 0.009 mM             | 2.3                  | 0.058               | 0.032 mM              |
| ref                                                                                                                                                                                                                                                                                   | 11                      | 11                                      | 11                   | 11                   | 37                  | 41                    |
| Parameter                                                                                                                                                                                                                                                                             | $v_{M\_F6PK}$           | $v_{M\_F26PP}$                          | $v_{M\_resp}$        | $K_{M\_resp}$        | $PPi_c$             | $K_{eq\_PPF}$         |
| Value                                                                                                                                                                                                                                                                                 | 0.00002 s <sup>-1</sup> | 0.001 s <sup>-1</sup>                   | 0.1 mM/s             | 0.13 mM              | 0.04 mM             | 3.3                   |
| ref                                                                                                                                                                                                                                                                                   | varied, see text        | varied, see text                        | 42                   | 7, 43, see text      | estimated, see text | 44                    |
| D. Parameters of the model related with sink metabolism and diurnal regulation. The rate constants of the diurnal regulation are slower than the rate constants of the enzymatic reactions, so the diurnal parameters are presented in h <sup>-1</sup> units for clarity of the Table |                         |                                         |                      |                      |                     |                       |
| Parameter                                                                                                                                                                                                                                                                             | $K_{eq\_SuSy}$          | $v_{M\_SuSy}$                           | $V_{so}$             | $K_{i\_cons}$        | $UDP_c$             | $K_{i\_st}$           |
| Value                                                                                                                                                                                                                                                                                 | 0.15                    | 0.6 mM/s                                | 0.75                 | 0.3                  | 1.3 mM              | 1 M                   |
| ref                                                                                                                                                                                                                                                                                   | 45                      | 46, 47                                  | 48                   | 47, 49               | 35                  | 50, 51, text          |
| Parameter                                                                                                                                                                                                                                                                             | $v_{M\_cons}$           | $v_{M\_exp}$                            | $k_{sb,1}$           | $k_{sb,2}$           | $K_{sb,1}$          | $K_{sb,2}$            |
| Value                                                                                                                                                                                                                                                                                 | 0.6 mM/s                | 0.004 mM/s                              | 0.02 h <sup>-1</sup> | 0.06 h <sup>-1</sup> | 0.4                 | 0.2                   |
| ref                                                                                                                                                                                                                                                                                   | 51, text                | 35, 42, text                            | 47, 49, 51           | 47, 49, 51           | 47, 49, 51          | 47, 49, 51            |
| Parameter                                                                                                                                                                                                                                                                             | $k_{db}$                | $k_{sX}$                                | $k_{dX}$             | $K_{iX\_I}$          | $K_{X\_I}$          | $k_{sa,1}$            |
| Value                                                                                                                                                                                                                                                                                 | 0.5 h <sup>-1</sup>     | 0.0023 h <sup>-1</sup> mM <sup>-1</sup> | 1 h <sup>-1</sup>    | 0.2                  | 1                   | 0.012 h <sup>-1</sup> |
| ref                                                                                                                                                                                                                                                                                   | 47, 49, 51              | 47, 49, 51                              | 47, 49, 51           | 52                   | 52                  | 47, 49, 51            |
| Parameter                                                                                                                                                                                                                                                                             | $k_{sa,2}$              | $k_{sa,3}$                              | $K_{sa,1}$           | $k_{da,1}$           | $k_{da,i}$          | $k_{sI}$              |
| Value                                                                                                                                                                                                                                                                                 | 0.02 h <sup>-1</sup>    | 0.23 h <sup>-1</sup>                    | 0.2                  | 0.03 h <sup>-1</sup> | 0.07                | 0.6 h <sup>-1</sup>   |
| ref                                                                                                                                                                                                                                                                                   | 47, 49, 51              | 47, 49, 51                              | 47, 49, 51           | 47, 49, 51           | 47, 49, 51          | 47, 49, 51            |
| Parameter                                                                                                                                                                                                                                                                             | $k_{dI}$                | $K_{i\_sI}$                             | $k_{sD}$             | $k_{dD}$             | $k_{sGPT}$          | $k_{dGPT}$            |
| Value                                                                                                                                                                                                                                                                                 | 0.2 h <sup>-1</sup>     | 1 mM                                    | 0.0004               | 0.1 h <sup>-1</sup>  | 4 h <sup>-1</sup>   | 0.3 h <sup>-1</sup>   |
| ref                                                                                                                                                                                                                                                                                   | 47, 49, 51              | 47, 49, 51                              | 47, 49, 51           | 47, 49, 51           | Kunz 10             | Kunz 10               |
| Parameter                                                                                                                                                                                                                                                                             | $K_{sGPT}$              | $V_{M\_GPT2}$                           | $K_{St\_sink}$       | $V_{M\_St\_sink}$    | $k_{diurn0}$        | $K_{i\_diurn}$        |
| Value                                                                                                                                                                                                                                                                                 | 1.5                     | 0.08 mM/s                               | 0.1 mM               | 0.005 mM/s           | 0.3                 | 0.3                   |
| ref                                                                                                                                                                                                                                                                                   | 47, 49, 51              | 47, 49, 51                              | 47, 49, 51           | 47, 49, 51           | 47, 49, 51          | 47, 49, 51            |

## References

1. A. Arnold and Z. Nikoloski, *Trends Plant Sci*, 2011, **16**, 676-683.
2. C. Aflalo and N. Shavit, *FEBS Lett.*, 1983, **154**, 175-179.
3. I. E. Woodrow, D. J. Murphy and D. A. Walker, *Eur J Biochem*, 1983, **132**, 121-123.
4. S. A. Charles and B. Halliwell, in *Photosynthesis*, ed. G. Akoyunoglou, Balaban, Philadelphia 1981, vol. 4, pp. 347-356.
5. G. Pettersson and U. Ryde-Pettersson, *Eur J Biochem*, 1988, **175**, 661-672.
6. S. A. Charles and B. Halliwell, *Biochem J*, 1980, **185**, 689-693.
7. S. Arrivault, M. Guenther, A. Ivakov, R. Feil, D. Vosloh, J. T. van Dongen, R. Sulpice and M. Stitt, *Plant J*, 2009, **59**, 826-839.
8. M. Stitt, R. M. Lilley and H. W. Heldt, *Plant Physiol*, 1982, **70**, 971-977.
9. Y. Gibon, O. E. Blaesing, J. Hannemann, P. Carillo, M. Hohne, J. H. Hendriks, N. Palacios, J. Cross, J. Selbig and M. Stitt, *Plant Cell*, 2004, **16**, 3304-3325.

10. R. M. Lilley, C. J. Chon, A. Mosbach and H. W. Heldt, *Biochim Biophys Acta*, 1977, **460**, 259-272.
11. J. A. Bassham and G. H. Krause, *Biochim Biophys Acta*, 1969, **189**, 207-221.
12. C. Giersch, U. Heber, Y. Kobayashi, Y. Inoue, K. Shibata and H. W. Heldt, *Biochim Biophys Acta*, 1980, **590**, 59-73.
13. E. T. Pyl, M. Piques, A. Ivakov, W. Schulze, H. Ishihara, M. Stitt and R. Sulpice, *Plant Cell*, 2012, **24**, 2443-2469.
14. A. Strand, R. Zrenner, S. Trevanion, M. Stitt, P. Gustafsson and P. Gardestrom, *Plant J*, 2000, **23**, 759-770.
15. H. Winter, D. G. Robinson and H. W. Heldt, *Planta*, 1996, **193**, 530-535.
16. F. Shiraishi, K. Kawakami, A. Yuasa, T. Kojima and K. Kusunoki, *Biotechnol Bioeng*, 1987, **30**, 374-380.
17. A. Nag, M. Lunacek, P. A. Graf and C. H. Chang, *BMC Syst Biol*, 2011, **5**, 94.
18. A. Weber, J. C. Servaites, D. R. Geiger, H. Kofler, D. Hille, F. Groner, U. Hebbeker and U. I. Flugge, *Plant Cell*, 2000, **12**, 787-802.
19. T. Chia, D. Thorneycroft, A. Chapple, G. Messerli, J. Chen, S. C. Zeeman, S. M. Smith and A. M. Smith, *Plant J*, 2004, **37**, 853-863.
20. Y. Lu and T. D. Sharkey, *Planta*, 2004, **218**, 466-473.
21. Y. Lu, J. M. Steichen, S. E. Weise and T. D. Sharkey, *Planta*, 2006, **224**, 935-943.
22. D. Heineke, A. Kruse, U. I. Flugge, W. B. Frommer, J. W. Riesmeier, L. Willmitzer and H. W. Heldt, *Planta*, 1994, **193**, 174-180.
23. K. Deuschle, B. Chaudhuri, S. Okumoto, I. Lager, S. Lalonde and W. B. Frommer, *Plant Cell*, 2006, **18**, 2314-2325.
24. A. Weise, F. Groner, U. Sonnewald, H. Deppner, J. Lerchl, U. Hebbeker, U. I. Flugge and A. Weber, *FEBS Lett*, 1999, **461**, 13-18.
25. E. Claeysen and J. Rivoal, *Phytochemistry*, 2007, **68**, 709-731.
26. C. Foyer and C. Spencer, *Planta*, 1986, **167**, 369-375.
27. G. Zimmermann, G. J. Kelly and E. Latzko, *J Biol Chem*, 1978, **253**, 5952-5956.
28. A. Gardemann and A. M. Heldt, *Hoppe-Seyler's Zeitschrift fur Physiologische Chemie*, 1983, **364**, 1127.
29. M. Stitt, G. Mieskes, H. D. Soling and H. W. Heldt, *FEBS Lett*, 1982, **145**, 217-222.
30. S. C. Huber and D. M. Bickett, *Plant Physiol*, 1984, **74**, 445-447.
31. A. Lytovchenko, L. Sweetlove, M. Pauly and A. R. Fernie, *Planta*, 2002, **215**, 1013-1021.
32. I. Ciereszko, H. Johansson and L. A. Kleczkowski, *Biochem J*, 2001, **354**, 67-72.
33. J. E. Lunn and T. ap Rees, *Biochem J*, 1990, **267**, 739-743.
34. L. Elling, *Phytochemistry*, 1996, **42**, 955-960.
35. M. H. Stitt, S; Kerr, P., in *The Biochemistry of Plants*, eds. M. D. Hatch and N. K. Boardman, Academic Press, New York 1987, vol. 10, pp. 327-409.
36. G. H. Walker and S. C. Huber, *FEBS Lett*, 1987, **213**, 375-380.
37. S. P. Colowick and E. W. Sutherland, *J. Biol. Chem.*, 1942, **144**, 423-435.
38. M. Stitt, I. Wilke, R. Feil and H. W. Heldt, *Planta*, 1988, **174**, 217-230.
39. D. Villadsen and T. H. Nielsen, *Biochem J*, 2001, **359**, 591-597.
40. J. E. Markham and N. J. Kruger, *Eur J Biochem*, 2002, **269**, 1267-1277.
41. F. D. Macdonald, Q. Chou, B. B. Buchanan and S. M., *J. Biol. Chem.*, 1989, **264**, 5540-5544.
42. S. C. Zeeman and T. A. Rees, ;, *Plant, Cell and Environment*, 1999, **22**, 1445-1453.

43. F. E. Podesta and W. C. Plaxton, *Biochim Biophys Acta*, 1992, **1160**, 213-220.
44. W. C. Plaxton, *Annu. Rev. plant Physiol. plant Mol. Biol.*, 1996, **47**, 185-214.
45. D. P. Delmer, *J Biol Chem*, 1972, **247**, 3822-3828.
46. S. C. Huber, P. S. Kerr and W. Kalt-Torres, in *Phloem transport*, eds. J. Cronshaw, W. J. Lucas, ; and R. G. Giaquinta, Liss, A.R., Inc., New York 1986, pp. 355-367.
47. Y. Gibon, O. E. Blasing, N. Palacios-Rojas, D. Pankovic, J. H. Hendriks, J. Fisahn, M. Hohne, M. Gunther and M. Stitt, *Plant J*, 2004, **39**, 847-862.
48. T. H. Nielsen and B. Veierskov, *Plant Physiol*, 1990, **93**, 637-641.
49. A. Graf, A. Schlereth, M. Stitt and A. M. Smith, *Proc Natl Acad Sci U S A*, 2010, **107**, 9458-9463.
50. M. Stettler, S. Eicke, T. Mettler, G. Messerli, S. Hortensteiner and S. C. Zeeman, *Mol Plant*, 2009, **2**, 1233-1246.
51. S. Comparot-Moss, O. Kotting, M. Stettler, C. Edner, A. Graf, S. E. Weise, S. Streb, W. L. Lue, D. MacLean, S. Mahlow, G. Ritte, M. Steup, J. Chen, S. C. Zeeman and A. M. Smith, *Plant Physiol*, 2010, **152**, 685-697.
52. Y. Lu, J. P. Gehan and T. D. Sharkey, *Plant Physiol*, 2005, **138**, 2280-2291.
